# Supplementary material for: Acute lymphoblastic leukemia cells are able to infiltrate the brain subventricular zone stem cell niche and impair neurogenesis
Source: PubMed Central journal article supplement — Haematologica. 2022 Jan 20;107(4):1004–7. doi: 10.3324/haematol.2021.279383 (PMC8968908; doi:10.3324/haematol.2021.279383), 2022-01-20

**Acute lymphoblastic leukemia cells are able to infiltrate the brain subventricular zone stem cell niche and impair neurogenesis**

Lidia M. Fernández-Sevilla,<sup>1,2</sup> Germán Belenguer,<sup>3</sup> Beatriz Martí-Prado,<sup>3</sup> Paula Ortiz-Sánchez,<sup>1</sup> Manuel Ramírez,<sup>4</sup> Alberto Varas,<sup>1,2</sup> Isabel Fariñas<sup>3</sup> and Ángeles Vicente<sup>1,2</sup>

<sup>1</sup>Department of Cell Biology, Faculty of Medicine, Complutense University, Madrid; <sup>2</sup>Instituto de Investigación Sanitaria del Hospital Clínico San Carlos (IdISSC), Madrid; <sup>3</sup>CIBERNED, Departamento de Biología Celular, Biología Funcional y Antropología Física, Instituto de Biotecnología y Biomedicina, Universitat de València, Valencia and <sup>4</sup>Department of Pediatric Hematology and Oncology, Advanced Therapies Unit, Niño Jesús University Children's Hospital, Madrid, Spain

Correspondence:

ÁNGELES VICENTE - [avicente@ucm.es](mailto:avicente@ucm.es)

ISABEL FARIÑAS - [isabel.farinhas@uv.es](mailto:isabel.farinhas@uv.es)

doi:10.3324/haematol.2021.279383

**Supplementary Figure 1. B-cell precursor acute lymphoblastic leukemia cells appear in the subventricular (SVZ) niche as well as along the rostral migratory stream (RMS) in a xenograft model. (A) Immunofluorescence microscopy images show leukemic cells located in the rostral horn SVZ, a region which represents the beginning of the RMS (B), and also forming small aggregates along the RMS, the pathway followed by SVZ-derived neuroblasts migrating to the olfactory bulb (OB) (C, D). ALL cells located in the olfactory bulb (E). (hCD19 staining, red; Hoechst nuclear counterstaining, blue).**

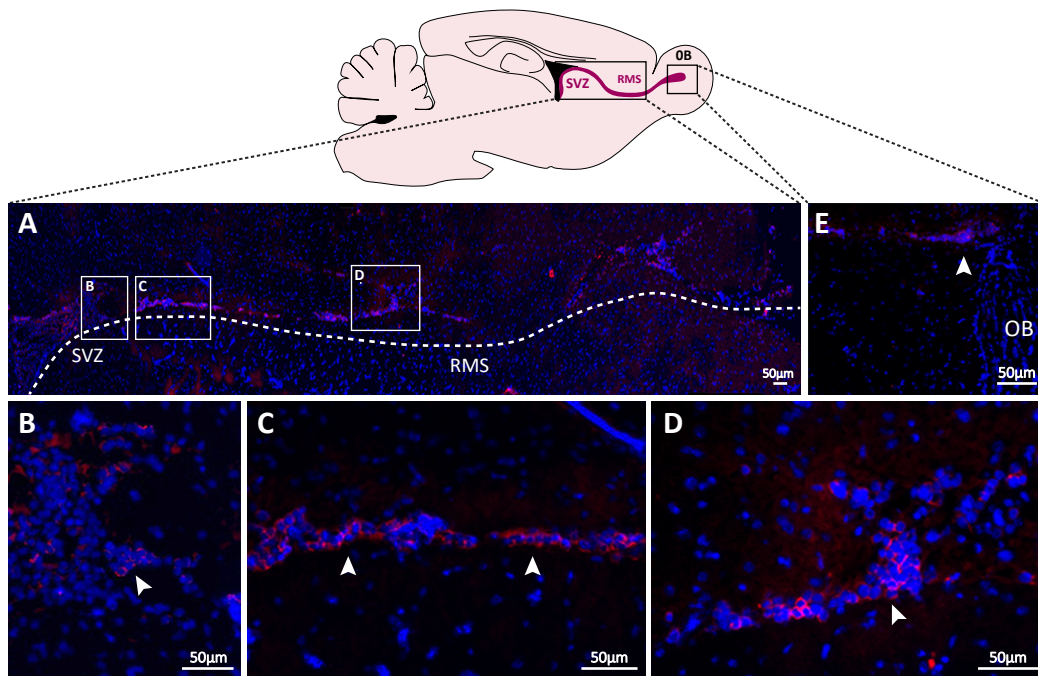

Supplement: 2021_279383_FERNANDEZ-SEVILLA_SUPPL.pdf [file 2021_279383_FERNANDEZ-SEVILLA_SUPPL.pdf]
